# Supplementary material
Source: Research Square preprint supplement (doi:10.21203/rs.3.rs-8774970/v1)
Supplement: Supplementary file 1 [file 8183f9808ff3c967bd050f6c.docx]

**Supplementary Materials**

**Figure S1. Subgroup Analysis Showing Cardiovascular Risk Stratification by Dr. Noon CVD (Alternative Risk Categories) Within the SCORE2 High Risk Group.** 2

**Figure S2. Flowchart of Participant Selection from The UK Biobank.** 3

**Figure S3. Age-specific Distribution of Dr. Noon CVD Scores Among (A) Female and (B) Male Participants.** 4

**Figure S4. Overview of the AI-derived Retinal Imaging (Dr. Noon CVD) Deep Learning Framework.** 5

**Table S1. Impact of Sequential Covariate Adjustment on 5-Year Cardiovascular Event Risk Across Dr. Noon CVD Groups Stratified by Original and Alternative Risk Categories.** 6

**Table S2. Concordance and Discordance of Risk Classification Between Dr. Noon CVD (Alternative Risk Categories) and SCORE2 Algorithms.** 7

**Table S3. Impact of Sequential Covariate Adjustment on 5-Year Cardiovascular Event Risk Across Dr. Noon CVD Groups Stratified by Original and Alternative Risk Categories.** 8

**Table S4. Association Between Dr. Noon CVD Risk Groups and 10-Year Cardiovascular Events in Participants With Dyslipidemia Without Cholesterol-Lowering Medication.** 9

**Table S5. Impact of Sequential Covariate Adjustment on 10-Year Cardiovascular Event Risk Across Dr. Noon CVD Groups Stratified by Original and Alternative Risk Categories.** 10

**Table S6. Incidence Rates and Unadjusted Hazard Ratios for 10-Year Cardiovascular Events Stratified by Age and Sex Subgroups Using Within-Group Risk Quartiles.** 11

**Table S7. Hazard Ratios for 10-Year Cardiovascular Events Stratified by Dr. Noon CVD Alternative Risk Classification Within the SCORE2 High Risk Subgroup.** 12

**Table S8. Disease Definitions and Code Lists.** 13

**Table S9. Distribution of Dr. Noon CVD Score Percentiles Stratified by Age and Sex** 15**Table S3. Baseline Characteristics of Participants With Dyslipidemia Without Cholesterol-Lowering Medication (Dr. Noon CVD Alternative Risk Classification).** 15


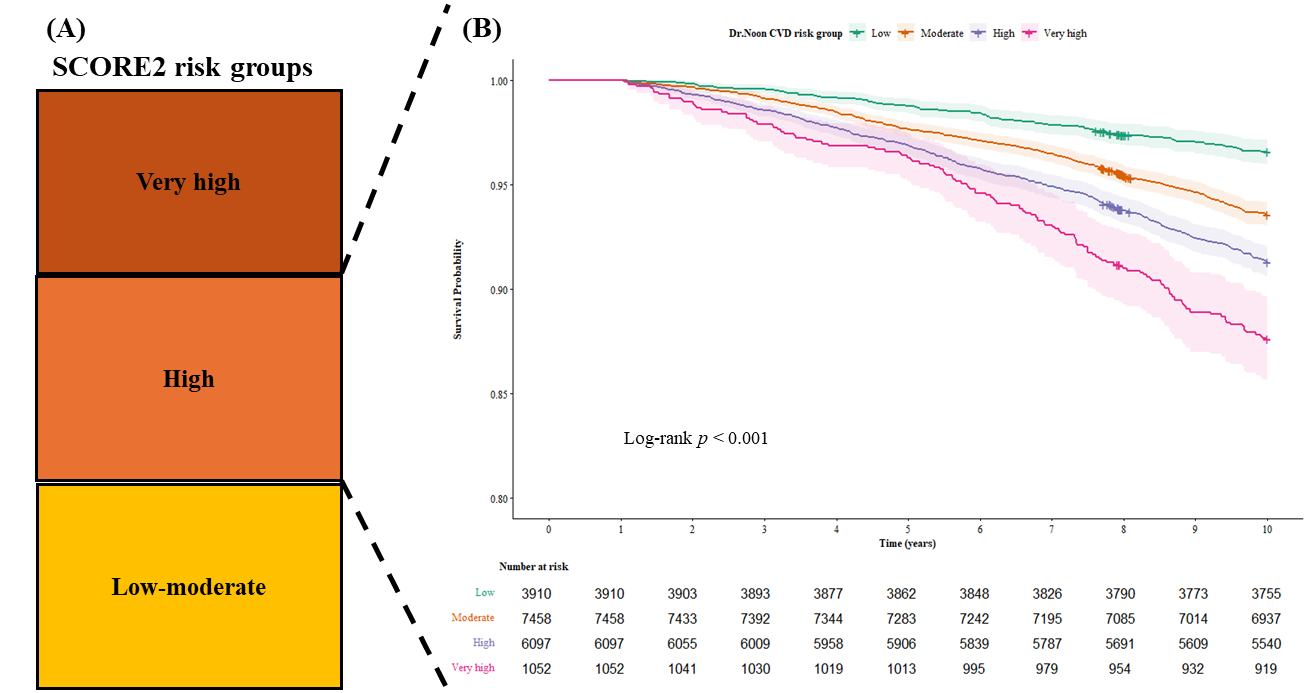


**Figure S1. Subgroup Analysis Showing Cardiovascular Risk Stratification by Dr. Noon CVD (Alternative Risk Categories) Within the SCORE2 High Risk Group.**

(A) Schematic representation of SCORE2 risk categories (low-moderate, high, very-high), highlighting the ‘High’ risk subgroup selected for this analysis. (B) Kaplan-Meier estimates of 10-year cardiovascular event-free survival for participants within this SCORE2 high-risk subgroup, stratified by Dr. Noon CVD alternative risk classification (low, moderate, high, very-high). The number at risk is provided below the graph. SCORE2, Systematic Coronary Risk Evaluation 2.

**
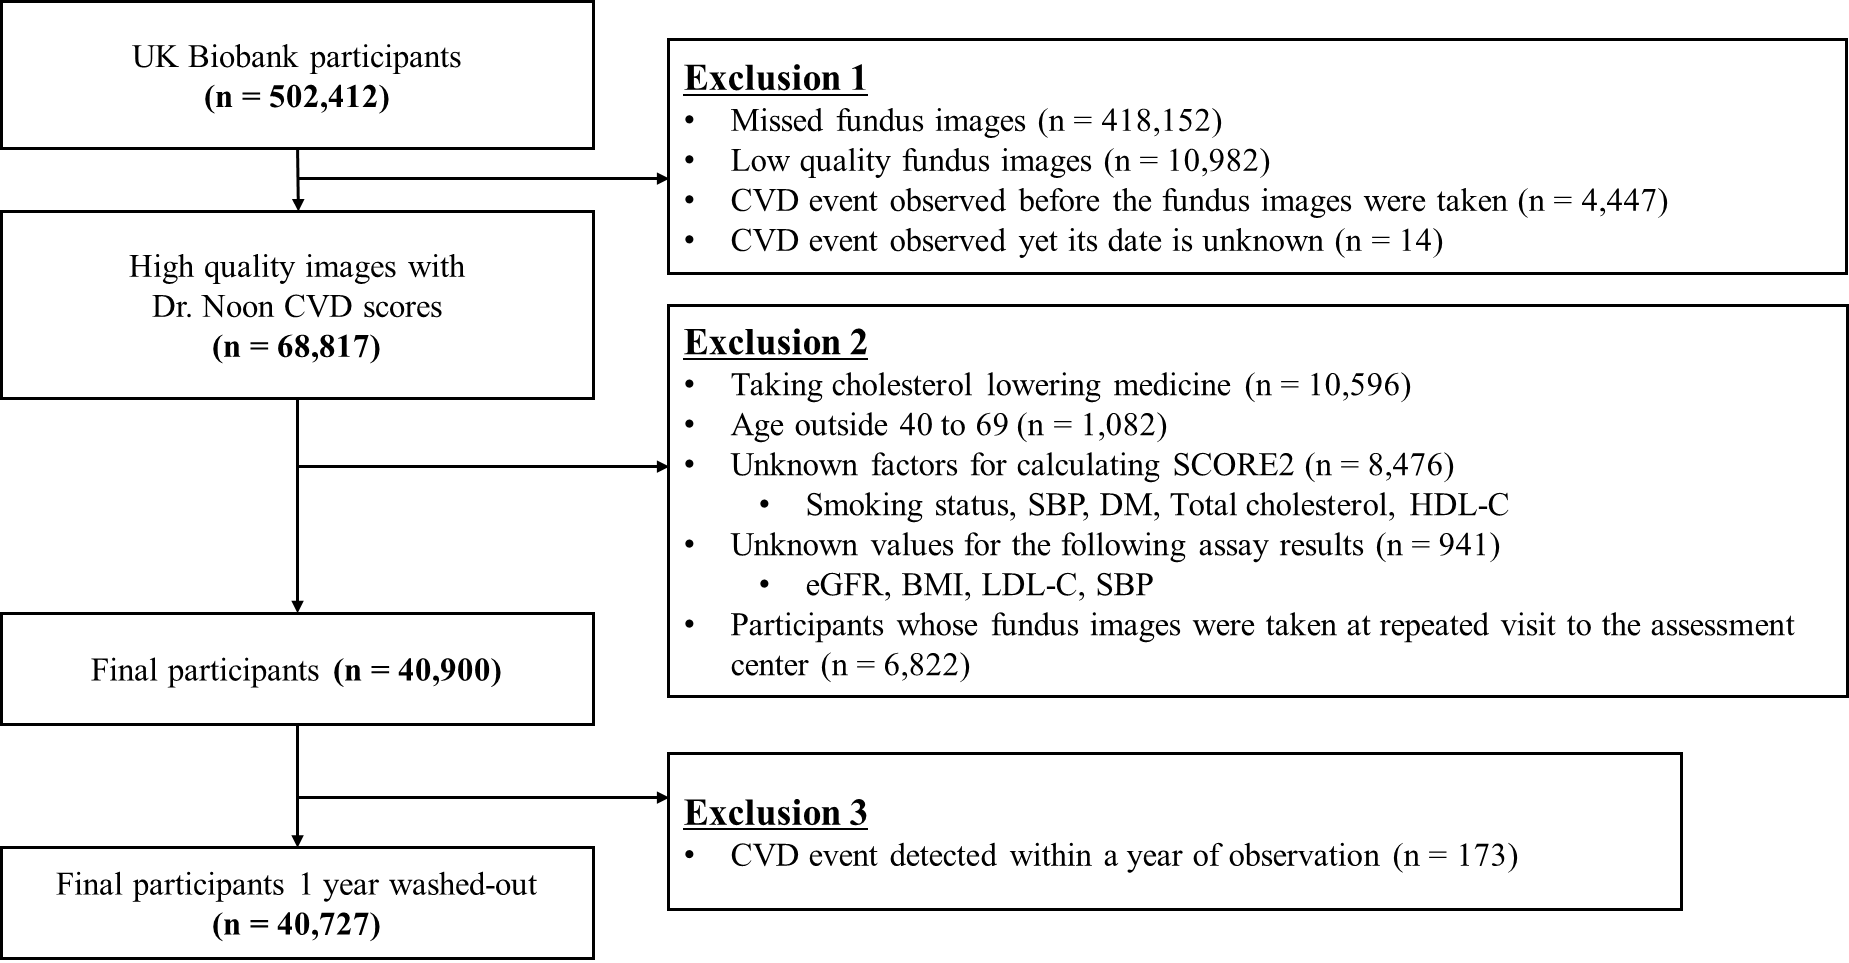
**

**Figure S2. Flowchart of Participant Selection from The UK Biobank.**

Among 502,412 participants, 68,817 with valid Dr. Noon CVD scores were identified after excluding invalid images and baseline CVD. Following exclusions for cholesterol-lowering medication, age appropriateness, missing clinical variables, and repeated visits, 40,900 individuals remained. The final analytic cohort comprised 40,727 participants after excluding cardiovascular events occurring within the first year. BMI, body mass index; CVD, cardiovascular disease; DM, diabetes mellitus; eGFR, estimated glomerular filtration rate; HDL-C, high-density lipoprotein cholesterol; LDL-C, low-density lipoprotein cholesterol; SBP, systolic blood pressure; SCORE2, Systematic COronary Risk Evaluation 2.


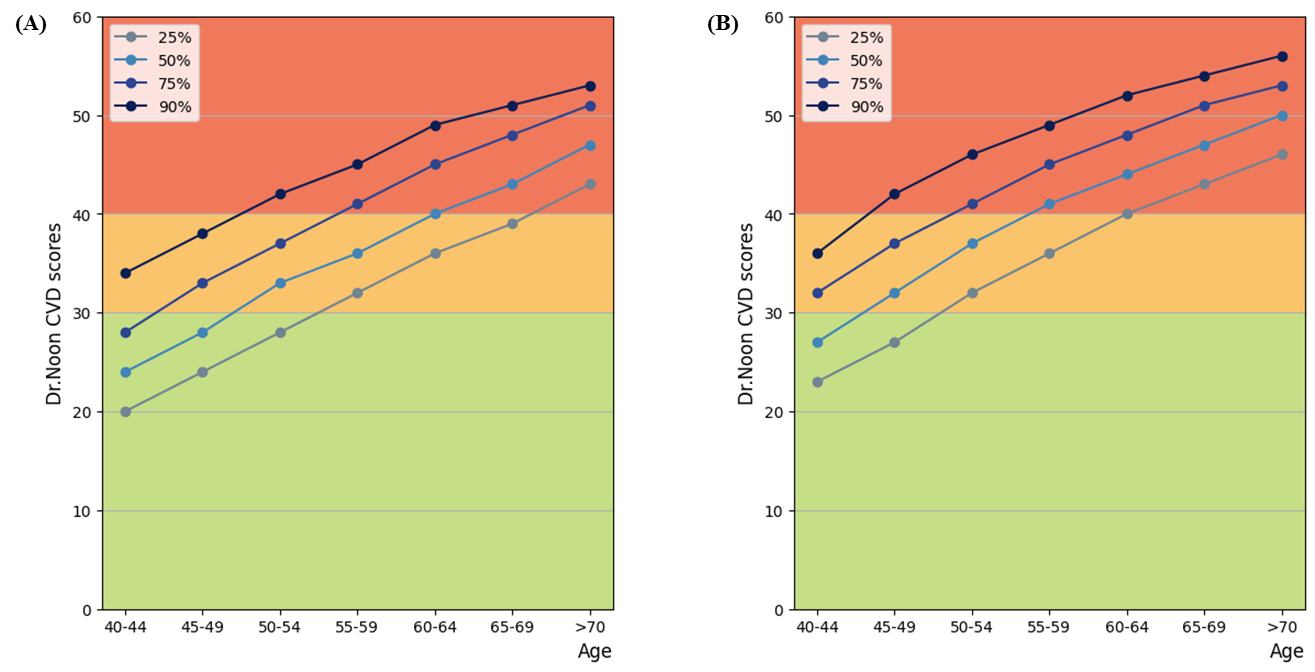


**Figure S3. Age-specific Distribution of Dr. Noon CVD Scores Among (A) Female and (B) Male Participants.**

Percentile trajectories (25th, 50th, 75th, and 90th) of Dr. Noon CVD scores are shown across 5-year age intervals. Background shading represents predefined cardiovascular risk zones based on Dr. Noon CVD thresholds: low (green), moderate (yellow), and high (red). Dr. Noon CVD scores demonstrated an age-dependent increase in all percentiles. P25, 25th percentile; P75, 75th percentile; P90, 90th percentile.


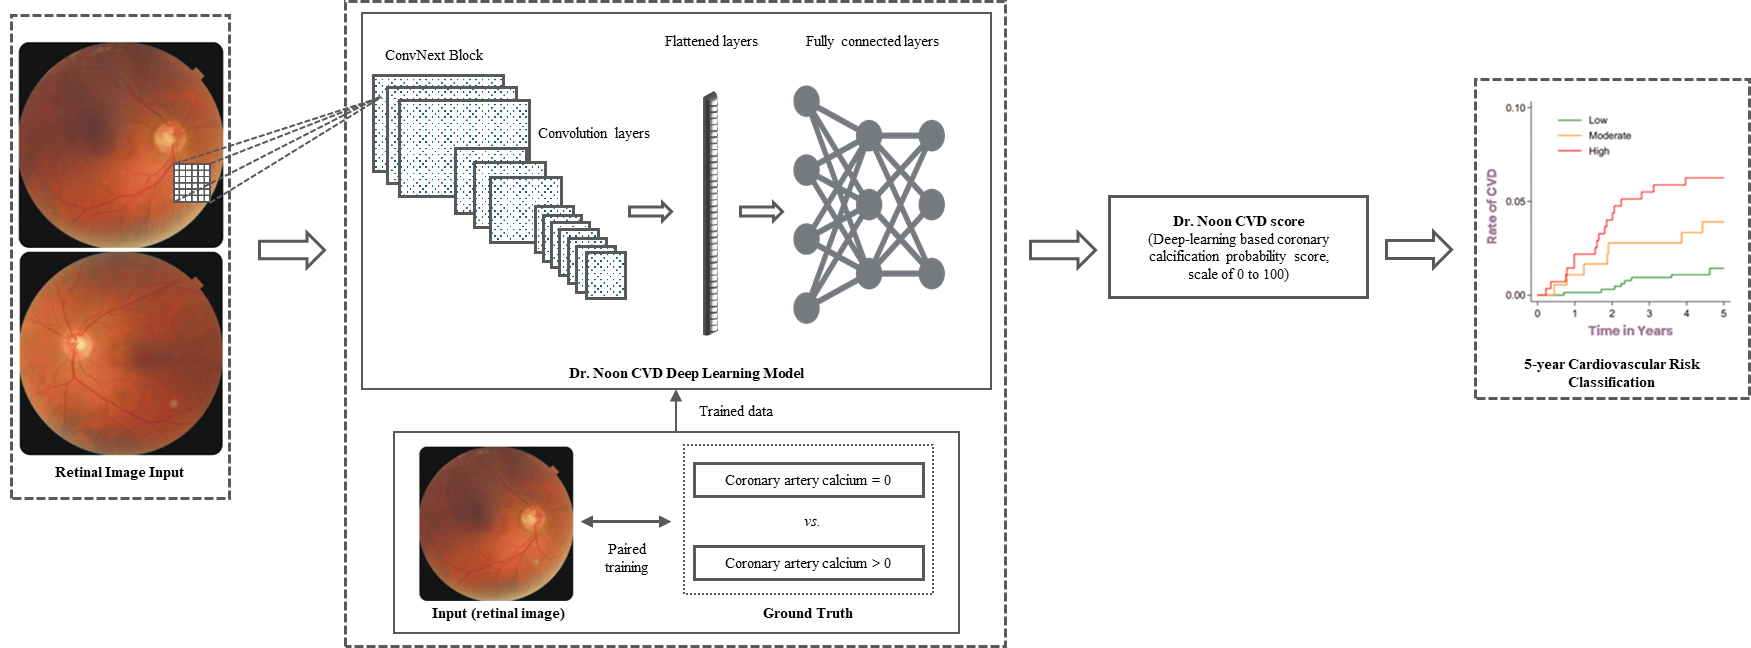


**Figure S4. Overview of the AI-derived Retinal Imaging (Dr. Noon CVD) Deep Learning Framework.**
This diagram depicts the analytic workflow in which a retinal fundus image is processed through a convolutional neural network comprising sequential convolutional, pooling, and fully connected layers to yield the Dr. Noon CVD score (range, 0-100). The model quantifies retinal vascular and structural features to estimate a 5-year cardiovascular risk and stratifies individuals into low (<1%), moderate (1–5%), or high (>5%) risk categories.

|  | **Dyslipidemia without medication** | **Dr. Noon CVD risk groups** | | | |  |
| --- | --- | --- | --- | --- | --- | --- |
|  | **Low (<31)** | **Moderate (31-40)** | **High (≥41-50)** | **Very high (≥51)** | ***p*-value** |
| **Variable, n (%)** | **40,727 (100)** | **11,560 (28.4)** | **15,678 (38.5)** | **11,300 (27.7)** | **2,189 (5.4)** |  |
| **Age**, mean±SD, years | 56.00±14.00 | 47.00±18.00 | 56.00±11.00 | 62.00±8.00 | 64.00±6.00 | < 0.001 |
| 40-49, n (%) | 11,790 (28.9) | 7,680 (66.4) | 3,522 (22.5) | 565 (5.0) | 23 (1.1) | < 0.001 |
| 50-59, n (%) | 13,910 (34.2) | 3,245 (28.1) | 7,038 (44.9) | 3,299 (29.2) | 328 (15.0) | < 0.001 |
| 60-69, n (%) | 15,027 (36.9) | 635 (5.5) | 5,118 (32.6) | 7,436 (65.8) | 1,838 (84.0) | < 0.001 |
| **Male**, n (%) | 17,128 (42.1) | 3,702 (32.0) | 6,307 (40.2) | 5,704 (50.5) | 1,415 (64.6) | < 0.001 |
| **Smokers**, n (%) | 23,853 (58.6) | 6,232 (53.9) | 9,045 (57.7) | 7,099 (62.8) | 1,477 (67.5) | < 0.001 |
| **Diabetes**, n (%) | 541 (1.3) | 103 (0.9) | 180 (1.1) | 197 (1.7) | 61 (2.8) | < 0.001 |
| **Hypertension**, n (%) | 21,597 (53.03) | 3,937 (34.1) | 8,393 (53.5) | 7,619 (67.4) | 1,648 (75.3) | < 0.001 |
| **SBP**, mean±SD, mmHg | 134.00±24.50 | 126.00±20.50 | 134.00±23.00 | 140.50±24.50 | 144.00±25.00 | < 0.001 |
| **DBP**, mean±SD, mmHg | 81.00±13.50 | 78.50±13.00 | 81.50±13.50 | 83.00±13.50 | 83.50±13.50 | < 0.001 |
| **Triglyceride**, mean±SD, mg/dL | 322.75±94.06 | 304.50±92.67 | 326.29±92.64 | 334.66±91.14 | 329.21±87.06 | < 0.001 |
| **TC**, mean±SD, mg/dL | 225.68±53.36 | 215.35±52.44 | 228.40±52.77 | 232.37±52.98 | 229.82±49.88 | < 0.001 |
| **LDL-C**, mean±SD, mg/dl | 140.91±41.07 | 132.95±40.46 | 142.46±40.45 | 146.11±39.79 | 143.74±38.01 | < 0.001 |
| **HDL-C**, mean±SD, mg/dl | 56.77±19.84 | 56.88±19.03 | 57.35±20.38 | 56.34±20.07 | 54.99±18.83 | < 0.001 |
| **eGFR**, mean±SD, ml/min/1.73m2 | 92.90±17.00 | 98.70±17.20 | 93.00±16.40 | 90.10±15.80 | 88.60±14.90 | < 0.001 |
| **BMI**, mean±SD, kg/m² | 26.22±5.51 | 25.60±5.48 | 26.17±5.44 | 26.78±5.36 | 26.85±5.46 | < 0.001 |
| **SCORE2**, mean±SD, % | 4.80±4.80 | 2.50±2.40 | 4.70±3.90 | 7.10±4.70 | 9.00±5.00 | < 0.001 |
| **CVD events, n (%)** |  |  |  |  |  |  |
| 10-year CVD events, n (%) | 2,531 (6.21) | 279 (2.4) | 875 (5.6) | 1,064 (9.4) | 313 (14.3) | < 0.001 |
| 5-year CVD events, n (%) | 944 (2.3) | 103 (0.9) | 319 (2.0) | 403 (3.6) | 119 (5.4) | < 0.001 |

**Table S1. Baseline Characteristics of Participants With Dyslipidemia Without Cholesterol-Lowering Medication (Dr. Noon CVD Alternative Risk Classification).**

Values are expressed as mean±SD or n (%). Comparisons performed with Kruskal–Wallis tests or χ² tests. BMI, body mass index; CVD, cardiovascular disease; DBP, diastolic blood pressure; eGFR, estimated glomerular filtration rate; HDL-C, high-density lipoprotein cholesterol; IQR, interquartile range; LDL-C, low-density lipoprotein cholesterol; SBP, systolic blood pressure; SD, standard deviation; TC, total cholesterol; SCORE2, Systematic COronary Risk Evaluation 2.

| **Dr. Noon CVD Risk Groups** | **Total (n)** | **SCORE2 Risk Groups (n, %)** | | |
| --- | --- | --- | --- | --- |
| **Low-moderate** | **High** | **Very high** |
| **Low (<31)** | 11,560 | **7,459 (64.5)** | 3,910 (33.8) | 191 (1.7) |
| **Moderate (31-40)** | 15,678 | **6,892 (44.0)** | 7,458 (47.6) | 1,328 (8.5) |
| **High (41-50)** | 11,300 | 2,519 (22.3) | **6,097 (54.0)** | 2,684 (23.8) |
| **Very High (≥51)** | 2,189 | 239 (10.9) | 1,052 (48.1) | **898 (41.0)** |
| Pearson’s chi-square *p*-value: <0.001 | | | | |

**Table S2. Concordance and Discordance of Risk Classification Between Dr. Noon CVD (Alternative Risk Categories) and SCORE2 Algorithms.**

Data are presented as number (%). The *p*-value was calculated using Pearson's chi-square test to evaluate the association between Dr. Noon CVD risk tiers and SCORE2 risk categories. SCORE2, Systematic COronary Risk Evaluation 2.

| **Variable** | **Unadjusted model**  HR (95% CI), *p*-value | **Demographic-adjusted model**  HR (95% CI), *p*-value | **Traditional risk-adjusted model**  HR (95% CI), *p*-value | **Fully adjusted model**  HR (95% CI), *p*-value |
| --- | --- | --- | --- | --- |
| **Dr. Noon CVD groups stratified by original risk categories** | | | | |
| **Dr. Noon CVD** |  |  |  |  |
| Low | 1 (Reference) | 1 (Reference) | 1 (Reference) | 1 (Reference) |
| Moderate | 2.30 (1.84, 2.87), <0.001 | 1.36 (1.07, 1.74), 0.013 | 1.28 (1.00, 1.63), 0.051 | 1.26 (0.99, 1.61), 0.064 |
| High | 4.41 (3.57, 5.45), <0.001 | 1.74 (1.34, 2.25), <0.001 | 1.55 (1.20, 2.01), 0.002 | 1.51 (1.16, 1.95), 0.002 |
| **Age group** |  |  |  |  |
| 50-59 years | - | 1.71 (1.33, 2.20), <0.001 | 1.63 (1.27, 2.10), <0.001 | 1.64 (1.27, 2.11), <0.001 |
| 60-69 years | - | 3.50 (2.72, 4.51), <0.001 | 3.14 (2.43, 4.05), <0.001 | 3.203 (2.48, 4.14), <0.001 |
| **Gender (Male)** | - | 1.95 (1.70, 2.22), <0.001 | 1.84 (1.61, 2.11), <0.001 | 1.87 (1.63, 2.14), <0.001 |
| **Hypertension (yes)** | - | - | 1.72 (1.48, 2.00), <0.001 | 1.64 (1.40, 1.90), <0.001 |
| **Diabetes (yes)** | - | - | 1.95 (1.38, 2.77), <0.001 | 1.78 (1.25, 2.52), 0.001 |
| **Smoking (current)** | - | - | 1.08 (0.95, 1.24), 0.246 | 1.08 (0.95, 1.23), 0.257 |
| **eGFR ≥60mL/min/1.73m²** | - | - | - | 0.49 (0.35, 0.69), <0.001 |
| **BMI ≥30kg/m²** | - | - | - | 1.38 (1.19, 1.60), <0.001 |
| **Dr. Noon CVD groups stratified by alternative risk categories** | | | | |
| **Dr. Noon CVD** |  |  |  |  |
| Low | 1 (Reference) | 1 (Reference) | 1 (Reference) | 1 (Reference) |
| Moderate | 2.30 (1.84, 2.87), <0.001 | 1.37 (1.07, 1.76), 0.011 | 1.29 (1.01, 1.64), 0.045 | 1.27 (0.99, 1.62), 0.058 |
| High | 4.06 (3.27, 5.04), <0.001 | 1.68 (1.30, 2.18), <0.001 | 1.51 (1.16, 1.96), 0.002 | 1.47 (1.13, 1.91), 0.004 |
| Very high | 6.26 (4.81, 8.15), <0.001 | 2.11 (1.55, 2.88), <0.001 | 1.84 (1.34, 2.51), <0.001 | 1.75 (1.28, 2.40), <0.001 |
| **Age group** |  |  |  |  |
| 50-59 years | - | 1.71 (1.32, 2.20), <0.001 | 1.63 (1.27, 2.10), <0.001 | 1.64 (1.27, 2.11), <0.001 |
| 60-69 years | - | 3.45 (2.68, 4.45), <0.001 | 3.10 (2.40, 4.00), <0.001 | 3.17 (2.45, 4.09), <0.001 |
| **Gender (Male)** | - | 1.92 (1.68, 2.20), <0.001 | 1.82 (1.59, 2.09), <0.001 | 1.85 (1.62, 2.12), <0.001 |
| **Hypertension (yes)** | - | - | 1.72 (1.48, 2.00), <0.001 | 1.63 (1.40, 1.90), <0.001 |
| **Diabetes (yes)** | - | - | 1.94 (1.37, 2.75), <0.001 | 1.77 (1.24, 2.51), 0.001 |
| **Smoking (current)** | - | - | 1.08 (0.94, 1.23), 0.264 | 1.08 (0.94, 1.23), 0.276 |
| **eGFR ≥60mL/min/1.73m²** | - | - | - | 0.50 (0.36, 0.70), <0.001 |
| **BMI ≥30kg/m²** | - | - | - | 1.38 (1.19, 1.59), <0.001 |

**Table S3. Impact of Sequential Covariate Adjustment on 5-Year Cardiovascular Event Risk Across Dr. Noon CVD Groups Stratified by Original and Alternative Risk Categories.**

Hazard ratios and *p*-values are presented across incrementally adjusted models to illustrate the influence of covariate inclusion: demographic (age and sex), traditional risk (plus systolic blood pressure, smoking, diabetes, total cholesterol, and high-density lipoprotein cholesterol), and fully adjusted (further including estimated glomerular filtration rate and body mass index). Original classification comprised low, moderate, and high-risk groups. The alternative classification further divided the original high-risk group to define an additional very-high risk category representing the upper extreme of risk. BMI, body mass index; CI, confidence interval; CVD, cardiovascular disease; eGFR, estimated glomerular filtration rate; HDL-C, high-density lipoprotein cholesterol; HR, hazard ratio; SBP, systolic blood pressure.

| **Dr. Noon CVD risk groups** | **N** | **Cases** | **Person-years (PY)** | **Incidence rate**  **(per 1,000 PY)** | **Unadjusted HR**  **(95% CI)** | **Demographic-adjusted HR**  **(95% CI)** | **Traditional risk-adjusted HR**  **(95% CI)** | **Fully-adjusted HR** **(95% CI)** |
| --- | --- | --- | --- | --- | --- | --- | --- | --- |
| **Dr. Noon CVD groups stratified by original risk categories** | | | | | | | | |
| Low | 11,560 | 279 | 114,321 | 2.44 | 1 (Reference) | 1 (Reference) | 1 (Reference) | 1 (Reference) |
| Moderate | 15,678 | 875 | 153,179 | 5.71 | 2.35 (2.05, 2.69) | 1.41 (1.22, 1.63) | 1.34 (1.15, 1.55) | 1.32 (1.14, 1.53) |
| High | 13,489 | 1,377 | 129,119 | 10.66 | 4.41 (3.88, 5.01) | 1.81 (1.55, 2.12) | 1.64 (1.40, 1.92) | 1.60 (1.37, 1.87) |
| **HR trend (per group increase)** | | | | | ***2.03 (1.92, 2.15)*** | ***1.33 (1.23, 1.42)*** | ***1.27 (1.18, 1.35)*** | ***1.25 (1.16, 1.33)*** |
| ***p* for trend** | | | | | **<0.001** | **<0.001** | **<0.001** | **<0.001** |
| **Dr. Noon CVD groups stratified by alternative risk categories** | | | | | | | | |
| Low | 11,560 | 279 | 114,321 | 2.44 | 1 (Reference) | 1 (Reference) | 1 (Reference) | 1 (Reference) |
| Moderate | 15,678 | 875 | 153,179 | 5.71 | 2.35 (2.05, 2.69) | 1.42 (1.23, 1.65) | 1.35 (1.16, 1.56) | 1.33 (1.15, 1.54) |
| High | 11,300 | 1,064 | 108,551 | 9.80 | 4.05 (3.55, 4.62) | 1.74 (1.49, 2.04) | 1.59 (1.35, 1.86) | 1.55 (1.32, 1.81) |
| Very high | 2,189 | 313 | 20,568 | 15.22 | 6.32 (5.38, 7.42) | 2.26 (1.87, 2.72) | 2.00 (1.66, 2.42) | 1.92 (1.59, 2.33) |
| **HR trend (per group increase)** | | | | | ***1.82 (1.74, 1.90)*** | ***1.28 (1.21, 1.36)*** | ***1.24 (1.17, 1.31)*** | ***1.22 (1.15, 1.29)*** |
| ***p* for trend** | | | | | **<0.001** | **<0.001** | **<0.001** | **<0.001** |

**Table S4. Association Between Dr. Noon CVD Risk Groups and 10-Year Cardiovascular Events in Participants With Dyslipidemia Without Cholesterol-Lowering Medication.**

Demographic-adjusted model included age and sex. Traditional risk-adjusted model additionally adjusted for systolic blood pressure, smoking status, diabetes, total cholesterol, and high-density lipoprotein cholesterol. Fully adjusted model further included estimated glomerular filtration rate and body mass index. Original classification comprised low, moderate, and high-risk groups. The alternative classification further divided the original high-risk group to define an additional very-high risk category representing the upper extreme of risk. Incidence rates were calculated per 1,000 person-years. *p* for trend was estimated by modeling Dr. Noon CVD risk group as an ordinal variable. CI, confidence interval; PY, person-years; HR, hazard ratio.

| **Variable** | **Unadjusted model**  HR (95% CI), *p*-value | **Demographic-adjusted model**  HR (95% CI), *p*-value | **Traditional risk-adjusted model**  HR (95% CI), *p*-value | **Fully adjusted model**  HR (95% CI), *p*-value |
| --- | --- | --- | --- | --- |
| **Dr. Noon CVD groups stratified by original risk categories** | | | | |
| **Dr. Noon CVD** |  |  |  |  |
| Low | 1 (Reference) | 1 (Reference) | 1 (Reference) | 1 (Reference) |
| Moderate | 2.35 (2.05, 2.69), <0.001 | 1.41 (1.22, 1.64), <0.001 | 1.34 (1.15, 1.55), <0.001 | 1.32 (1.14, 1.53), <0.001 |
| High | 4.41 (3.88, 5.01), <0.001 | 1.81 (1.55, 2.12), <0.001 | 1.64 (1.40, 1.92), <0.001 | 1.60 (1.37, 1.87), <0.001 |
| **Age group** |  |  |  |  |
| 50-59 years | - | 1.81 (1.55, 2.11), <0.001 | 1.73 (1.49, 2.02), <0.001 | 1.74 (1.50, 2.03), <0.001 |
| 60-69 years | - | 3.46 (2.97, 4.04), <0.001 | 3.14 (2.69, 3.67), <0.001 | 3.22 (2.75, 3.76), <0.001 |
| **Gender (Male)** | - | 1.79 (1.65, 1.94), <0.001 | 1.70 (1.57, 1.85), <0.001 | 1.72 (1.59, 1.87), <0.001 |
| **Hypertension (yes)** | - | - | 1.59 (1.45, 1.74), <0.001 | 1.52 (1.38, 1.66), <0.001 |
| **Diabetes (yes)** | - | - | 2.19 (1.78, 2.70), <0.001 | 2.02 (1.64, 2.49), <0.001 |
| **Smoking (current)** | - | - | 1.05 (0.97, 1.14), 0.218 | 1.05 (0.97, 1.14), 0.229 |
| **eGFR ≥60mL/min/1.73m²** | - | - | - | 0.57 (0.46, 0.71), <0.001 |
| **BMI ≥30kg/m²** | - | - | - | 1.36 (1.25, 1.49), <0.001 |
| **Dr. Noon CVD groups stratified by alternative risk categories** | | | | |
| **Dr. Noon CVD** |  |  |  |  |
| Low | 1 (Reference) | 1 (Reference) | 1 (Reference) | 1 (Reference) |
| Moderate | 2.35 (2.05, 2.69), <0.001 | 1.42 (1.23, 1.65), <0.001 | 1.35 (1.16, 1.56), <0.001 | 1.33 (1.15, 1.54), <0.001 |
| High | 4.05 (3.55, 4.62), <0.001 | 1.74 (1.49, 2.04), <0.001 | 1.59 (1.35, 1.86), <0.001 | 1.55 (1.32, 1.82), <0.001 |
| Very high | 6.32 (5.38, 7.43), <0.001 | 2.26 (1.87, 2.72), <0.001 | 2.00 (1.66, 2.42), <0.001 | 1.92 (1.59, 2.33), <0.001 |
| **Age group** |  |  |  |  |
| 50-59 years | - | 1.81 (1.55, 2.11), <0.001 | 1.73 (1.49, 2.02), <0.001 | 1.75 (1.50, 2.03), <0.001 |
| 60-69 years | - | 3.40 (2.92, 3.98), <0.001 | 3.10 (2.65, 3.62), <0.001 | 3.17 (2.71, 3.71), <0.001 |
| **Gender (Male)** | - | 1.76 (1.62, 1.91), <0.001 | 1.68 (1.55, 1.82), <0.001 | 1.70 (1.57, 1.85), <0.001 |
| **Hypertension (yes)** | - | - | 1.58 (1.45, 1.73), <0.001 | 1.51 (1.38, 1.65), <0.001 |
| **Diabetes (yes)** | - | - | 2.18 (1.77, 2.68), <0.001 | 2.00 (1.62, 2.47), <0.001 |
| **Smoking (current)** | - | - | 1.05 (0.97, 1.14), 0.218 | 1.05 (0.97, 1.14), 0.229 |
| **eGFR ≥60mL/min/1.73m²** | - | - | - | 0.58 (0.46, 0.72), <0.001 |
| **BMI ≥30kg/m²** | - | - | - | 1.36 (1.24, 1.49), <0.001 |

**Table S5. Impact of Sequential Covariate Adjustment on 10-Year Cardiovascular Event Risk Across Dr. Noon CVD Groups Stratified by Original and Alternative Risk Categories.**

Hazard ratios and *p*-values are presented across incrementally adjusted models to illustrate the influence of covariate inclusion: demographic (age and sex), traditional risk (plus systolic blood pressure, smoking, diabetes, total cholesterol, and high-density lipoprotein cholesterol), and fully adjusted (further including estimated glomerular filtration rate and body mass index). Original classification comprised low, moderate, and high-risk groups. The alternative classification further divided the original high-risk group to define an additional very-high risk category representing the upper extreme of risk. BMI, body mass index; CI, confidence interval; CVD, cardiovascular disease; eGFR, estimated glomerular filtration rate; HDL-C, high-density lipoprotein cholesterol; HR, hazard ratio; SBP, systolic blood pressure.

| **Subgroup** | **Age-Sex Specific Dr. Noon CVD Score Quartile** | **N of Events / Total N** | **Person-Years (PY)** | **Incidence Rate (per 1,000 PY)** | **Unadjusted HR (95% CI)** | ***p*-value** |
| --- | --- | --- | --- | --- | --- | --- |
| **Female, 40-49 years** | **Q1-Q2 (<50%)** | 36 / 3,522 | 35,028 | 1.03 | 1 (Reference) |  |
| **Q3 (50-75%)** | 22 / 1,562 | 15,500 | 1.42 | 1.38 (0.81-2.35) | 0.232 |
| **Q4 (≥75%)** | 37 / 1,549 | 15,313 | 2.42 | **2.35 (1.49-3.72)** | **<0.001** |
| ***p* for trend** |  |  |  |  | **<0.001** |
| **Female, 50-59 years** | **Q1-Q2 (<50%)** | 138 / 4,386 | 43,282 | 3.19 | 1 (Reference) |  |
| **Q3 (50-75%)** | 73 / 2,058 | 20,271 | 3.60 | 1.13 (0.85-1.50) | 0.398 |
| **Q4 (≥75%)** | 79 / 1,876 | 18,396 | 4.29 | **1.35 (1.02-1.78)** | **0.034** |
| ***p* for trend** |  |  |  |  | **0.035** |
| **Female, 60-69 years** | **Q1-Q2 (<50%)** | 325 / 4,578 | 44,502 | 7.30 | 1 (Reference) |  |
| **Q3 (50-75%)** | 202 / 2,283 | 22,032 | 9.17 | **1.26 (1.06-1.50)** | **0.010** |
| **Q4 (≥75%)** | 165 / 1,785 | 17,179 | 9.60 | **1.32 (1.09-1.59)** | **0.004** |
| ***p* for trend** |  |  |  |  | **0.001** |
| **Male, 40-49 years** | **Q1-Q2 (<50%)** | 71 / 2,866 | 28,341 | 2.51 | 1 (Reference) |  |
| **Q3 (50-75%)** | 41 / 1,005 | 9,876 | 4.15 | **1.66 (1.13-2.44)** | **0.010** |
| **Q4 (≥75%)** | 62 / 1,286 | 12,551 | 4.94 | **1.98 (1.41-2.78)** | **<0.001** |
| ***p* for trend** |  |  |  |  | **<0.001** |
| **Male, 50-59 years** | **Q1-Q2 (<50%)** | 190 / 2,900 | 28,221 | 6.73 | 1 (Reference) |  |
| **Q3 (50-75%)** | 98 / 1,423 | 13,814 | 7.09 | 1.05 (0.83-1.35) | 0.670 |
| **Q4 (≥75%)** | 102 / 1,267 | 12,279 | 8.31 | 1.24 (0.97-1.57) | 0.085 |
| ***p* for trend** |  |  |  |  | 0.097 |
| **Male, 60-69 years** | **Q1-Q2 (<50%)** | 388 / 3,454 | 32,892 | 11.80 | **1 (Reference)** |  |
| **Q3 (50-75%)** | 241 / 1,472 | 13,697 | 17.60 | **1.50 (1.28-1.76)** | **<0.001** |
| **Q4 (≥75%)** | 261 / 1,455 | 13,442 | 19.42 | **1.66 (1.42-1.94)** | **<0.001** |
| ***p* for trend** |  |  |  |  | **<0.001** |

**Table S6. Incidence Rates and Unadjusted Hazard Ratios for 10-Year Cardiovascular Events Stratified by Age and Sex Subgroups Using Within-Group Risk Quartiles.**

To assess risk discrimination independent of demographic variances, participants were categorized based on the within-group percentile distribution of Dr. Noon CVD scores specific to each age and sex subgroup. Categories were defined as: Q1-2 (<50th percentile), Q3 (50th-75th percentile), and Q4 (≥75th percentile). Incidence rates are calculated per 1,000 person-years. *p* for trend was estimated by modeling the risk group as an ordinal variable. The analysis was performed in participants with dyslipidemia not receiving cholesterol-lowering medication. CI, confidence interval; HR, hazard ratio; PY, person-years; Q, quartile.

| **Dr. Noon CVD**  **risk groups** | **Prediction of 10-year CVD events** | | | | | | | |
| --- | --- | --- | --- | --- | --- | --- | --- | --- |
| Unadjusted HR (95% CI) | *p*-value | Demographic- adjusted HR (95% CI) | *p*-value | Traditional risk- adjusted HR (95% CI) | *p*-value | Fully-adjusted  HR (95% CI) | *p*-value |
| Low | 1 (Reference) | - | 1 (Reference) | - | 1 (Reference) | - | 1 (Reference) | - |
| Moderate | 1.90 (1.57, 2.30) | **<0.001** | 1.34 (1.09, 1.66) | 0.007 | 1.32 (1.07, 1.63) | **0.011** | 1.31 (1.06, 1.62) | **0.012** |
| High | 2.61 (2.16, 3.15) | **<0.001** | 1.56 (1.25, 1.94) | **<0.001** | 1.51 (1.21, 1.88) | **<0.001** | 1.48 (1.19, 1.85) | **< 0.001** |
| Very-high | 3.77 (2.97, 4.80) | **<0.001** | 2.09 (1.59, 2.75) | **<0.001** | 1.99 (1.52, 2.62) | **<0.001** | 1.94 (1.48, 2.55) | **< 0.001** |
| HR trend | 1.51 (1.41, 1.61) | **<0.001** | 1.24 (1.15, 1.34) | **<0.001** | 1.22 (1.13, 1.32) | **<0.001** | 1.21 (1.12, 1.31) | **<0.001** |

**Table S7. Hazard Ratios for 10-Year Cardiovascular Events Stratified by Dr. Noon CVD Alternative Risk Classification Within the SCORE2 High Risk Subgroup.**

Data are hazard ratios (95% CIs) unless otherwise stated. Models were sequentially adjusted to evaluate the stability of the association. The demographic-adjusted model controlled for age and sex. The traditional risk-adjusted model additionally controlled for systolic blood pressure, smoking status, diabetes, total cholesterol, and high-density lipoprotein cholesterol. The fully-adjusted model further included estimated glomerular filtration rate and body mass index. CI, confidence interval; CVD, cardiovascular disease; HR, hazard ratio; SCORE2, Systematic Coronary Risk Evaluation 2.

| **Cardiovascular event** | | |
| --- | --- | --- |
| **Domain** | **Component** | **Codes** |
| **ICD-10** | Coronary heart disease | I20–I25.* |
| Cerebrovascular disease | I60–I69.* |
| Transient ischaemic attack | G45.* |
| Heart failure | I50.*, I11.0, I13.0, I13.2, I110, I130, I132 |
| **ICD-9** | Coronary heart disease | 410–412 |
| Cerebrovascular disease | 430–438 |
| Heart failure | 428.* 402.01, 402.11, 402.91, 404.01, 404.03, 404.11, 404.13, 404.91, 404.93 |
| **OPCS-4** | CABG | K40–K46 (all subcodes) |
| PCI | K49.* (all subcodes) |
| **Self-report (Field 20002)** | Myocardial infarction | 1075 |
| Heart failure | 1076 |
| Stroke | 1081 |
| Transient ischaemic attack | 1082 |
| Subarachnoid haemorrhage | 1086 |
| Brain haemorrhage | 1491 |
| Ischaemic stroke | 1583 |
| **Dyslipidemia** | | |
| **Domain** | **Component** | **Codes** |
| **ICD-10 (Field 41270)** | Disorders of lipoprotein metabolism and other lipidaemias | E78 |
| Pure hypercholesterolaemia | E78.0 |
| Pure hyperglyceridaemia | E78.1 |
| Mixed hyperlipidaemia | E78.2 |
| Hyperchylomicronaemia | E78.3 |
| Other hyperlipidaemia | E78.4 |
| Hyperlipidaemia, unspecified | E78.5 |
| Other disorders of lipoprotein metabolism | E78.8 |
| Disorder of lipoprotein metabolism, unspecified | E78.9 |
| **ICD-9 (Field 41271)** | Disorders of lipoid metabolism | 272 |
| Pure hypercholesterolaemia | 2720 |
| Familial hypercholesterolaemia | 27200 |
| Hyper-beta-lipoproteinaemia | 27201 |
| Pure hypercholesterolaemia (hyperlipidaemia, group a) | 27202 |
| Low-density-lipoid-type (ldl) hyperlipoproteinaemia | 27203 |
| Pure hypercholesterolaemia (other) | 27209 |
| Pure hyperglyceridaemia | 2721 |
| Mixed hyperlipidaemia | 2722 |
| Hyperchylomicronaemia | 2723 |
| Other and unspecified hyperlipidaemia | 2724 |
| Hyperlipidaemia of nephrotic syndrome | 27240 |
| Hyperlipidaemia due to other specified causes | 27248 |
| Hyperlipidaemia not otherwise specified | 27249 |
| **Medication (Field 6177, 6153)** | Cholesterol lowering medication | 1 |
| **Self-report (Field 20002)** | high cholesterol | 1473 |
| **Total cholesterol (Field 30690), LDL-C (Field 30780), HDL-C (Field 30760), Triglyceride (Field 30780)** | Total cholesterol≥240, LDL-C≥160, HDL-C<40, or triglycerides≥200 |  |
|
|
|
| **Hypertension** | | |
| **Domain** | **Component** | **Codes** |
| **Systolic blood pressure (Field 4080), Diastolic blood pressure (Field 4079)** | Systolic blood pressure≥140 or diastolic blood pressure≥90 |  |
|
| **ICD-10 (Field 41270)** | Essential (primary) hypertension | I10* (all subcodes) |
| Hypertensive heart disease | I11* (all subcodes) |
| Hypertensive renal disease | I12* (all subcodes) |
| Hypertensive heart and renal disease | I13* (all subcodes) |
| Secondary hypertension | I15* (all subcodes) |
| **ICD-9 (Field 41271)** | Essential hypertension | 401* (all subcodes) |
| Hypertensive heart disease | 402* (all subcodes) |
| Hypertensive renal disease | 403* (all subcodes) |
| Hypertensive heart and renal disease | 404* (all subcodes) |
| Secondary hypertension | 405* (all subcodes) |
| **Self-report (Field 20002)** | hypertension | 1065 |
| essential hypertension | 1072 |
| gestational hypertension/pre-eclampsia | 1073 |
| **Diabetes** | | |
| **Domain** | **Component** | **Codes** |
| **ICD-10 (Field 41270)** | Insulin-dependent diabetes mellitus | E10* (all subcodes) |
| Non-insulin-dependent diabetes mellitus | E11* (all subcodes) |
| Malnutrition-related diabetes mellitus | E12* (all subcodes) |
| Other specified diabetes mellitus | E13* (all subcodes) |
| Unspecified diabetes mellitus | E14* (all subcodes) |
| **ICD-9 (Field 41271)** | Diabetes mellitus | 250* (all subcodes) |
| **Self-report (Field 20002)** | diabetes | 1220 |
| type 1 diabetes | 1222 |
| type 2 diabetes | 1223 |
| diabetic eye disease | 1276 |
| diabetic neuropathy/ulcers | 1468 |
| diabetic nephropathy | 1607 |

**Table S8. Disease Definitions and Code Lists.**

Cardiovascular events, dyslipidemia, hypertension, and diabetes were identified using hospital admission and procedural records (ICD-9, ICD-10, and OPCS-4 codes), self-reported diagnoses, medication records, and relevant clinical measurements, as summarized above. BMI, body mass index; CABG, coronary artery bypass grafting; CVD, cardiovascular disease; DBP, diastolic blood pressure; HDL-C, high-density lipoprotein cholesterol; ICD, International Classification of Diseases; LDL-C, low-density lipoprotein cholesterol; OPCS-4, Office of Population Censuses and Surveys Classification of Surgical Operations and Procedures, 4th Revision; PCI, percutaneous coronary intervention; SBP, systolic blood pressure.

| **Age groups**  **(years)** | **Female** | | | | | **Male** | | | | |
| --- | --- | --- | --- | --- | --- | --- | --- | --- | --- | --- |
| **N** | **Dr. Noon CVD score** | | | | **N** | **Dr. Noon CVD score** | | | |
| P25 | Median | P75 | P90 | P25 | Median | P75 | P90 |
| **40-44** | 3513 | 20 | 42 | 24 | 34 | 2947 | 23 | 42 | 32 | 36 |
| **45-49** | 5131 | 24 | 47 | 28 | 38 | 3965 | 27 | 47 | 37 | 42 |
| **50-54** | 5981 | 28 | 52 | 33 | 42 | 4364 | 32 | 52 | 41 | 46 |
| **55-59** | 6875 | 32 | 57 | 36 | 45 | 4924 | 36 | 57 | 45 | 49 |
| **60-64** | 9264 | 36 | 62 | 40 | 49 | 7217 | 40 | 62 | 48 | 52 |
| **65-69** | 6876 | 39 | 67 | 43 | 51 | 6101 | 43 | 67 | 51 | 54 |
| **70-76** | 778 | 43 | 71 | 47 | 53 | 880 | 46 | 71 | 53 | 56 |

**Table S9. Distribution of Dr. Noon CVD Score Percentiles Stratified by Age and Sex.**

Data are presented as Dr. Noon CVD scores corresponding to specific percentiles within each age group. N, number of participants; P25, 25th percentile; P75, 75th percentile; P90, 90th percentile.
